# Supplementary material for: SIPA1 Enhances Aerobic Glycolysis Through HIF-2α Pathway to Promote Breast Cancer Metastasis
Source: Front Cell Dev Biol. 2022 Jan 12;9:779169. doi: 10.3389/fcell.2021.779169 (PMC8790513; doi:10.3389/fcell.2021.779169)
Supplement: Supplementary file 1 [file DataSheet1.ZIP]

Archive with 41 entries (40 files):
- row images for WB/
- row images for WB/Figure 1A left SIPA1.tif
- row images for WB/Figure 1A left tubulin.tif
- row images for WB/Figure 1A right SIPA1.tif
- row images for WB/Figure 1A right tubulin.tif
- row images for WB/Figure 1F left HIF1A.tif
- row images for WB/Figure 1F left HK2.tif
- row images for WB/Figure 1F left LDHA.tif
- row images for WB/Figure 1F left c-myc.tif
- row images for WB/Figure 1F left tubulin.tif
- row images for WB/Figure 1F right HIF1A.tif
- row images for WB/Figure 1F right HK2.tif
- row images for WB/Figure 1F right LDHA.tif
- row images for WB/Figure 1F right c-myc.tif
- row images for WB/Figure 1F right tubulin.tif
- row images for WB/Figure 2H PDK1 left.tif
- row images for WB/Figure 2H PDK1 right.tif
- row images for WB/Figure 2H tubulin left.tif
- row images for WB/Figure 2H tubulin right.tif
- row images for WB/Figure 3E left HIF2A.tif
- row images for WB/Figure 3E left tubulin.tif
- row images for WB/Figure 3E right HIF2A.tif
- row images for WB/Figure 3E right tubulin.tif
- row images for WB/Figure 4A HIF2A.tif
- row images for WB/Figure 4A HK2.tif
- row images for WB/Figure 4A LDHA.tif
- row images for WB/Figure 4A PDK1.tif
- row images for WB/Figure 4A SLC2A1.tif
- row images for WB/Figure 4A tubulin.tif
- row images for WB/Figure 4D HIF2A.tif
- row images for WB/Figure 4D HK2.tif
- row images for WB/Figure 4D LDHA.tif
- row images for WB/Figure 4D PDK1.tif
- row images for WB/Figure 4D SLC2A1.tif
- row images for WB/Figure 4D tubulin.tif
- row images for WB/Figure S1 SIPA1.tif
- row images for WB/Figure S2 SIPA1.tif
- row images for WB/Figure S2 tubulin.tif
- row images for WB/Figure S4 GAPDH.tif
- row images for WB/Figure S4 H2A.tif
- row images for WB/Figure S4 SIPA1 H2A.tif
